# Supplementary material for: Role of peptidylarginine deiminase 2 (PAD2) in mammary carcinoma cell migration
Source: Springer Nature journal article supplement (doi:10.1186/s12885-017-3354-x), 2017-05-26

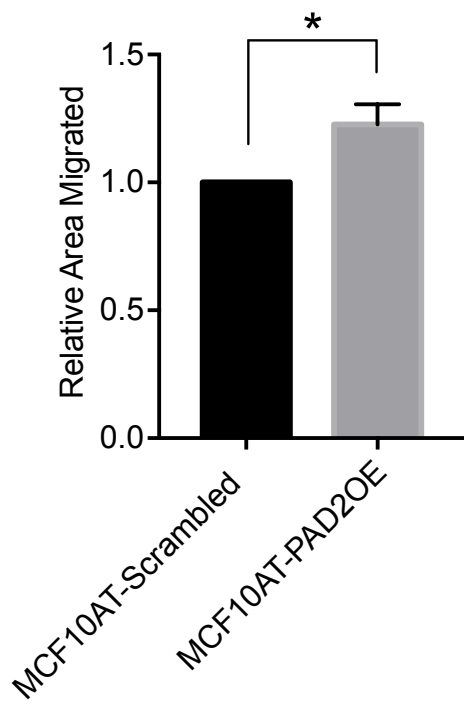

Supplement: MOESM1 [file 12318962]
